# Supplementary material for: Feed Restriction Modifies Intestinal Microbiota-Host Mucosal Networking in Chickens Divergent in Residual Feed Intake
Source: PubMed Central journal article supplement (PMC6351724; doi:10.1128/msystems.00261-18), 2019-01-29
Supplement: mSystems.00261-18-st002.pdf [file mSystems.00261-18-st002.pdf]

**TABLE S2** Alpha-diversity of bacterial microbiota communities in ileal and cecal digesta of low and high residual feed intake (RFI) broiler chickens fed either *ad libitum* or restrictively<sup>1,2</sup>

| Parameter        | <i>Ad libitum</i> feeding |          | Restrictive feeding |          | SEM    | P value         |       |          |
|------------------|---------------------------|----------|---------------------|----------|--------|-----------------|-------|----------|
|                  | low RFI                   | high RFI | low RFI             | high RFI |        | FL <sup>3</sup> | RFI   | FL × RFI |
| <b>Ileum</b>     |                           |          |                     |          |        |                 |       |          |
| Observed species | 50                        | 52       | 84                  | 91       | 15.882 | 0.026           | 0.794 | 0.870    |
| Shannon          | 2.19                      | 2.20     | 3.00                | 3.22     | 0.288  | 0.002           | 0.678 | 0.718    |
| Simpson          | 0.59                      | 0.60     | 0.70                | 0.76     | 0.047  | 0.007           | 0.420 | 0.659    |
| <b>Ceca</b>      |                           |          |                     |          |        |                 |       |          |
| Observed species | 286                       | 274      | 303                 | 297      | 10.258 | 0.060           | 0.406 | 0.785    |
| Shannon          | 5.71                      | 5.67     | 5.85                | 5.73     | 0.123  | 0.394           | 0.518 | 0.747    |
| Simpson          | 0.94                      | 0.94     | 0.95                | 0.94     | 0.008  | 0.643           | 0.630 | 0.558    |

<sup>1</sup>Data are presented as least-square means and pooled SEM.  $n = 7$  per FL group, RFI rank, and sex; except for  $n = 8$

high RFI *ad libitum* females.

<sup>2</sup>RFI was calculated for the experimental period from 9 to 30 days post-hatch.

<sup>3</sup>FL, feed intake level.
