# Supplementary material for: Feed Restriction Modifies Intestinal Microbiota-Host Mucosal Networking in Chickens Divergent in Residual Feed Intake
Source: PubMed Central journal article supplement (PMC6351724; doi:10.1128/msystems.00261-18), 2019-01-29
Supplement: mSystems.00261-18-st008.pdf [file mSystems.00261-18-st008.pdf]

**TABLE S8** Oligonucleotide nucleotide primers used for the gene expression experiment

| Gene symbol <sup>1</sup> | Accession number <sup>2</sup>                                                                                                     | Forward primer (5'-3')   | Reverse primer (5'-3')        | Amplicon size (bp) | E (%) <sup>3</sup> | R <sup>2</sup> | Ref. <sup>4</sup> |
|--------------------------|-----------------------------------------------------------------------------------------------------------------------------------|--------------------------|-------------------------------|--------------------|--------------------|----------------|-------------------|
| Housekeeping genes       |                                                                                                                                   |                          |                               |                    |                    |                |                   |
| <i>ACTB</i>              | NM_205518.1                                                                                                                       | GAGAAATTGTGCGTGACATCA    | CCTGAACCTCTCATTGCCA           | 152                | 100.2              | 0.99           | 1                 |
| <i>B2M</i>               | NM_001001750.1                                                                                                                    | ACTTCACACCCAGCAGCG       | GGCACAGCTCAGAACTCGG           | 103                | 102.5              | 0.99           | 1                 |
| <i>GAPDH</i>             | NM_204305.1                                                                                                                       | TATCTTCCAGGAGCGTGACC     | TCTCCATGGTGGTGAAGACA          | 95                 | 92.5               | 1.00           | 1                 |
| <i>HPRT1</i>             | NM_204848.1                                                                                                                       | GATGAACAAGGTTACGACCTGGA  | TATAGCCACCCTTGAGTACACAG<br>AG | 181                | 94.7               | 0.99           | 1                 |
| <i>SNRPD3</i>            | NM_001007838.1                                                                                                                    | CCAGATATGTTGAAGAACGCTCCT | GTTGCCACGACCCATACCA           | 141                | 104.6              | 0.98           | 1                 |
| Target genes             |                                                                                                                                   |                          |                               |                    |                    |                |                   |
| <i>OCN</i>               | NM_205128.1                                                                                                                       | CAGCACCTACCTCAACCAGTACAT | AGGCAGAGCAGGATGACGAT          | 102                | 107.4              | 0.99           | 1                 |
| <i>ZOI</i>               | XM_015278975.1,<br>XM_015278976.1,<br>XM_015278977.1,<br>XM_015278978.1,<br>XM_015278979.1,<br>XM_015278980.1,<br>XM_015278981.1, | CAACTGGTGTGGGTTTCTGAA    | TCACTACCAGGAGCTGAGAGGTA<br>A  | 101                | 98.7               | 0.99           | 1                 |
| <i>CLDN1</i>             | NM_001013611.2                                                                                                                    | CCAGGTGAAGAAGATGCGGA     | GGTGTGAAAGGGTCATAGAAGGC       | 129                | 104.4              | 0.99           | 1                 |
| <i>CLDN5</i>             | NM_204201.1                                                                                                                       | CAGGTCGCCAGAGATACAGG     | GAAGCCTTCATAGCCTAAGCAT<br>C   | 157                | 99                 | 0.99           | 1                 |
| <i>IAP</i>               | XM_015291488.1,<br>XM_015291489.1                                                                                                 | CCACTCGCATGTCTTCACCTT    | CATTGCCGTAGAGGATGCTG          | 116                | 91.1               | 1.00           | 1                 |
| <i>TLR2</i>              | NM_001161650.1,<br>NM_204278.1                                                                                                    | GGGCACAGGTTGGGAGTG       | CCAACGACCACCAGGATGA           | 112                | 104.4              | 0.99           | 1                 |
| <i>TLR4</i>              | NM_001030693.1                                                                                                                    | TGCAGTTTCTGGATCTTTCAAG   | GCGACGTTAAGCCATGGAA           | 144                | 107.0              | 0.99           | 1                 |
| <i>TNFA</i>              | AY765397.1                                                                                                                        | TCGGGAGTGGGCTTTAAGAAG    | GAAAGCCACTAGGAGCAGACA         | 112                | 104.7              | 0.99           | 1                 |
| <i>IL1B</i>              | NM_204524.1                                                                                                                       | GGGCATCAAGGGCTACAA       | CTGTCCAGGCGGTAGAAGAT          | 88                 | 96.2               | 0.99           | 1                 |
| <i>IL6</i>               | JN639847.1,<br>HM179640.1,<br>AJ250838.2,<br>NM_204628.1                                                                          | GAGGGCCGTTTCGCTATTTG     | ATTGTGCCCGAACTAAAACATTC       | 67                 | 108.4              | 0.98           | 2                 |

|                                   |                                   |                        |                               |     |       |      |   |
|-----------------------------------|-----------------------------------|------------------------|-------------------------------|-----|-------|------|---|
| <i>IL8</i>                        | HM179639.1                        | TCCTGGTTTCAGCTGCTCTGT  | CGCAGCTCATTCCCCATCT           | 61  | 113.1 | 0.97 | 2 |
| <i>IL10</i>                       | EF554720.1                        | GCTGAGGGTGAAGTTTGAGG   | AGACTGGCAGCCAAAGGTC           | 121 | 90.3  | 0.99 | 3 |
| <i>TGFB1</i>                      | NM_001318456.1                    | CGGCCGACGATGAGTGGCTC   | CGGGGCCCATCTCACAGGA           | 120 | 99.3  | 0.99 | 2 |
| <i>NFKB</i>                       | NM_205134.1                       | CCATGGTAACTCGGACAGGG   | GCTGTTTCGTAGTGGTAAGTCTGA      | 193 | 98.9  | 0.99 | - |
| <i>MUC1</i>                       | XM_015279046.1,<br>XM_015279045.1 | GGGAATCTGTGGCCTGTTGA   | TTCTCAGCATCTCTCCCCCA          | 83  | 93.2  | 0.99 | - |
| <i>MUC2</i>                       | NM_001318434.1                    | GCCTGCCCAGGAAATCAAG    | CGACAAGTTTGTGGCACAT           | 59  | 99.3  | 0.99 | 2 |
| <i>SLC16A1</i><br>( <i>MCT1</i> ) | NM_001006323.1,<br>XM_015298930.1 | CTTTGGCTGGCTTAGCTCG    | TTGTAGTCACCATACATGTCGTTG<br>A | 162 | 93.6  | 0.99 | 1 |
| <i>SLC5A12</i><br>( <i>SMCT</i> ) | XM_416173.5                       | GGCTTCAGCGTTTGGGACTA   | TGCAGAAGATGGCACCGTAG          | 235 | 90.6  | 0.98 | - |
| <i>SLC5A1</i><br>( <i>SGLT1</i> ) | NM_001293240.1                    | CAATGCTGCGGACATCTCTGTT | TGTTCTGCTATGCCACAAA           | 199 | 94.3  | 0.99 | - |
| <i>SLC2A2</i><br>( <i>GLUT2</i> ) | NM_207178.1                       | CGGCTGGGGAGGGTGAAAGC   | CCC GCCCAGCGATGATGAGG         | 106 | 92.2  | 0.99 | 4 |

<sup>1</sup>*ACTB*, *Gallus gallus* actin, beta; *B2M*, *Gallus gallus* beta-2-microglobulin; *CLDN1*, *Gallus gallus* claudin 1; *CLDN5*, *Gallus gallus* claudin 5; *GAPDH*, *Gallus gallus* glyceraldehyde-3-phosphate dehydrogenase; *HPRT1*, *Gallus gallus* hypoxanthine phosphoribosyltransferase 1; *IL1B*, *Gallus gallus* interleukin 1 beta; *IL6*, *Gallus gallus* interleukin 6; *IL8*, *Gallus gallus* interleukin 8; *IL10*, *Gallus gallus* interleukin 10; *MUC1*, *Gallus gallus* mucin 1; *MUC2*, *Gallus gallus* mucin 2; *NFKB*, *Gallus gallus* nuclear factor kappa B; *OCLDN*, *Gallus gallus* occludin; *SNRPD3*, *Gallus gallus* small nuclear ribonucleoprotein D3 polypeptide; *TGFB1*, *Gallus gallus* transforming growth factor beta 1; *TLR2*, *Gallus gallus* toll-like receptor 2; *TLR4*, *Gallus gallus* toll-like receptor 4; *TNFA*, *Gallus gallus* lipopolysaccharide-induced tumor necrosis factor-alpha factor; *ZO1*, *Gallus gallus* zona occludens 1.

<sup>2</sup>National Center for Biotechnology Information (NCBI) Entrez Gene (<http://www.ncbi.nlm.nih.gov/sites/entrez?db=gene>).

<sup>3</sup>E, PCR efficiency:  $E = (10^{(-1/\text{slope})} - 1) \times 100$ .

<sup>4</sup>Ref., references for oligonucleotide primer sequences.

## References

1. Metzler-Zebeli BU, Magowan E, Hollmann M, Ball MEE, Molnár A, Witter K, Ertl R, Hawken RJ, Lawlor PG, O'Connell NE, Aschenbach J, Zebeli Q. 2018.

Differences in intestinal size, structure, and function contributing to feed efficiency in broiler chickens reared at geographically distant locations. *Poult Sci* 97:578–591. <https://doi.org/10.3382/ps/pex332>.

2. Chen J, Tellez G, Richards JD, Escobar J. 2015. Identification of potential biomarkers for gut barrier failure in broiler chickens. *Front Vet Sci* 2:14. <https://doi.org/10.3389/fvets.2015.00014>.
3. Grenier B, Schwartz-Zimmermann HE, Caha S, Moll WD, Schatzmayr G, Applegate TJ. 2015. Dose-dependent effects on sphingoid bases and cytokines in chickens fed diets prepared with *Fusarium verticillioides* culture material containing fumonisins. *Toxins (Basel)* 7:1253–1272. <https://doi.org/10.3390/toxins7041253>.
4. Franssens L, Lesuisse J, Wang Y, Willems E, Willemsen H, Koppenol A, Guo X, Buyse J, Decuypere E, Everaert N. 2016. The effect of insulin on plasma glucose concentrations, expression of hepatic glucose transporters and key gluconeogenic enzymes during the perinatal period in broiler chickens. *Gen Comp Endocrinol* 232:67-75. <https://doi.org/10.1016/j.ygcen.2015.12.026>.
